# Supplementary material for: BMP5 silencing inhibits chondrocyte senescence and apoptosis as well as osteoarthritis progression in mice
Source: publisher site journal article supplement (doi:10.18632/aging.202708), 2021-03-19
Supplement: Supplementary file [file aging-v13i7-202708-supplementary-material-SD1.pdf]

## SUPPLEMENTARY FIGURES

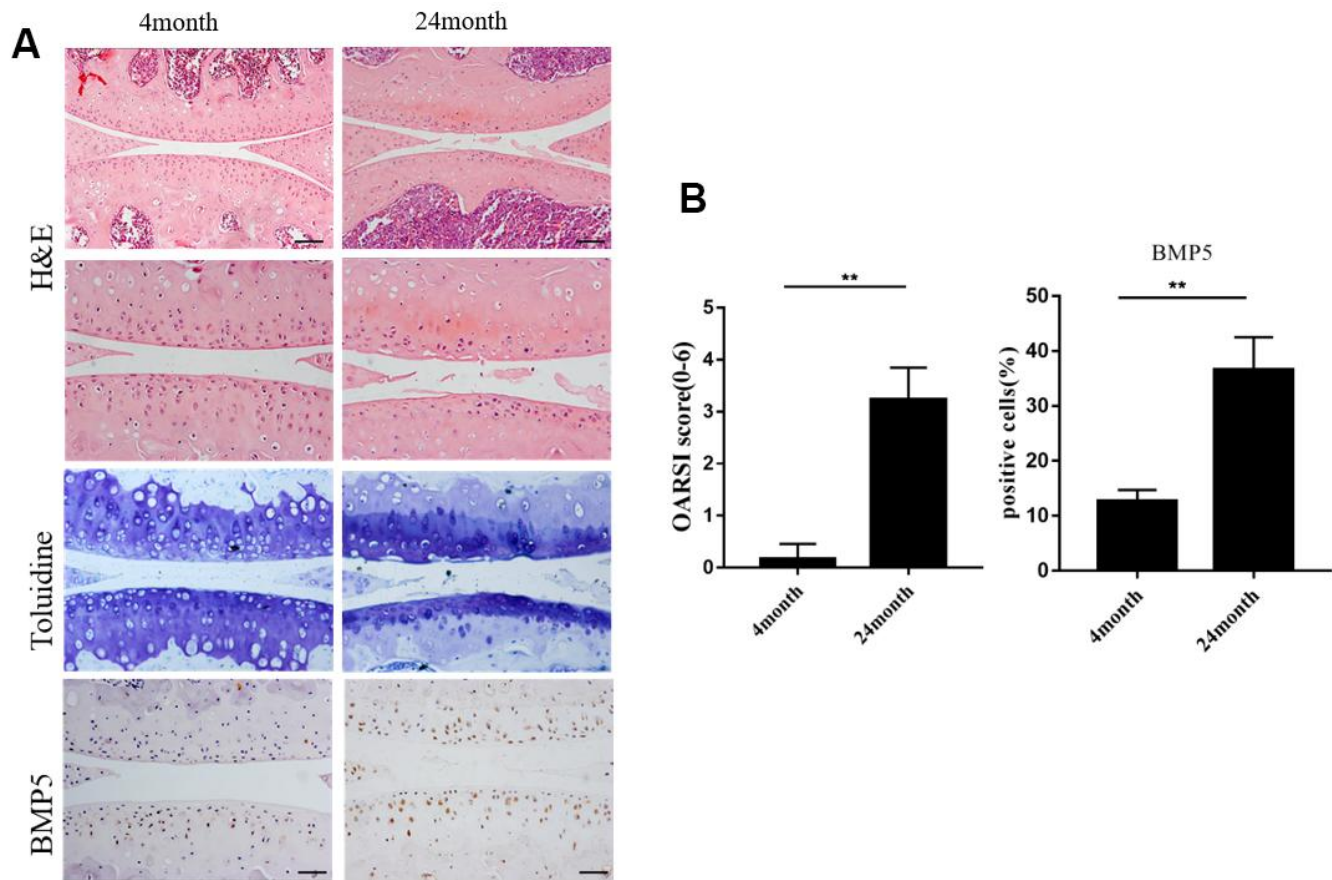

**Supplementary Figure 1. BMP5 expression is elevated in chondrocytes from the aged mice.** (A) Representative images show Safranin O-Fast Green staining and BMP5 immunohistochemical staining in the knee cartilage tissues from young and aged mouse OAA model. Scale bars: 10  $\mu\text{m}$  (first line) and 5  $\mu\text{m}$  (others). (B) Quantitative analysis of BMP5 expression and OARSI scores in the DMM mouse model and aged mice are shown. All data are represented as the means  $\pm$  SD (n = 5 per group). scale bars: 5  $\mu\text{m}$ ; \*\*P<0.01.

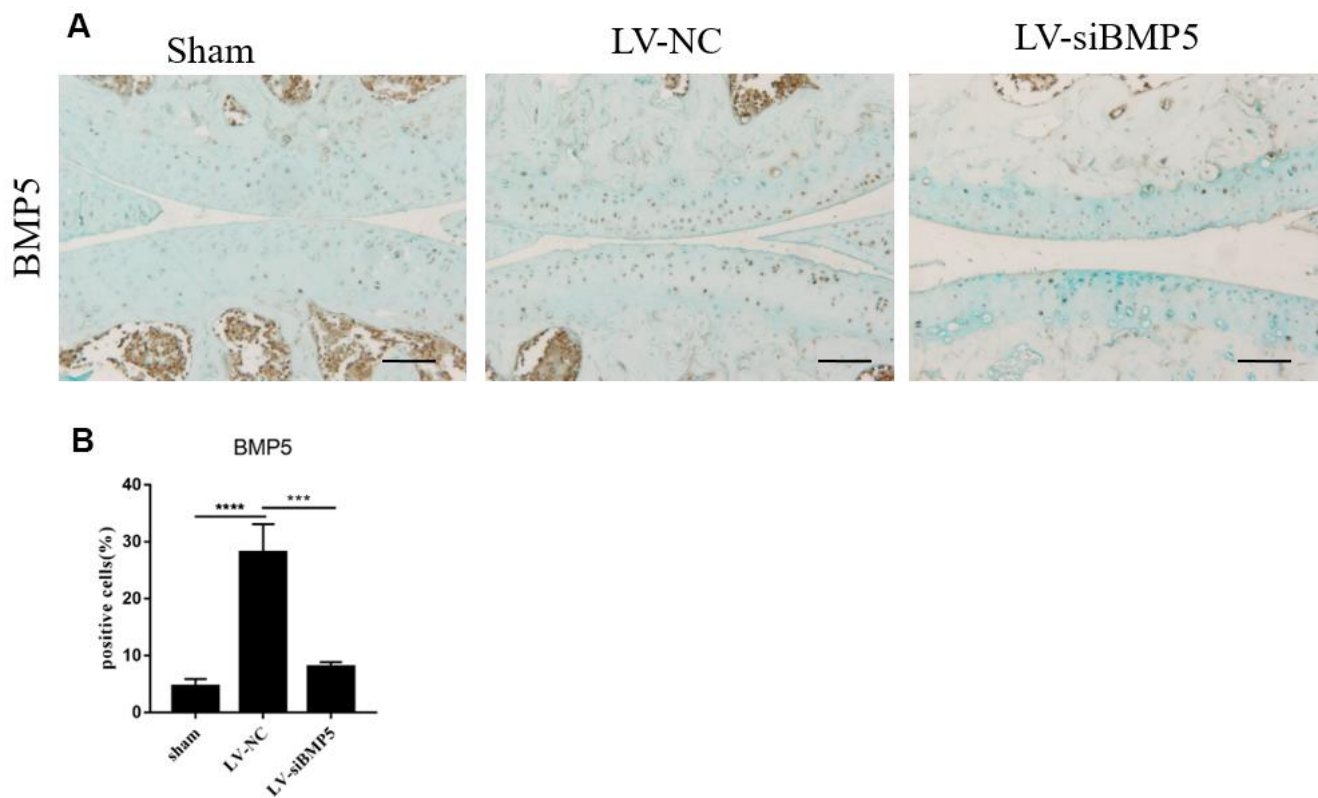

**Supplementary Figure 2. Quantitative analysis of lentivirus-mediated BMP5 silencing in DMM model mice.** (A, B) Representative immunohistochemical (IHC) images and quantitative analysis shows BMP5 expression in the knee articular cartilage tissue sections from sham-operated, DMM plus LV-siNC, and DMM plus LV-siBMP5 groups of mice at 4 weeks post-DMM operation. All data are represented as the means  $\pm$  SD (n=5 per group); scale bar: 5  $\mu$ m; \*\*\*\*P<0.01; \*\*\*\*\*P<0.0001.

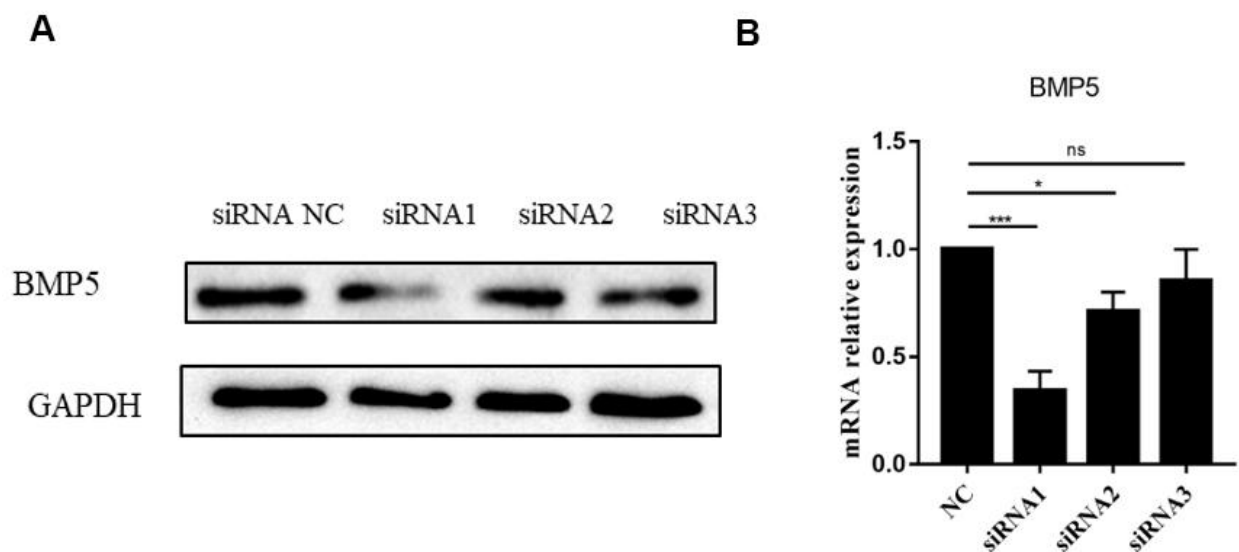

**Supplementary Figure 3. Analysis of BMP5 knockdown efficiency of BMP5-targeting siRNAs.** (A) QRT-PCR (left) and (B) western blotting (right) analyses show BMP5 mRNA and protein levels in murine chondrocytes transfected with siNC, BMP5-siRNA1, BMP5-siRNA2, and BMP5-siRNA3, respectively. As shown, the highest knockdown of BMP5 was achieved with BMP5-siRNA1 compared to the siNC control. Note: ns, no significance; \*P<0.05; \*\*\*P<0.001.

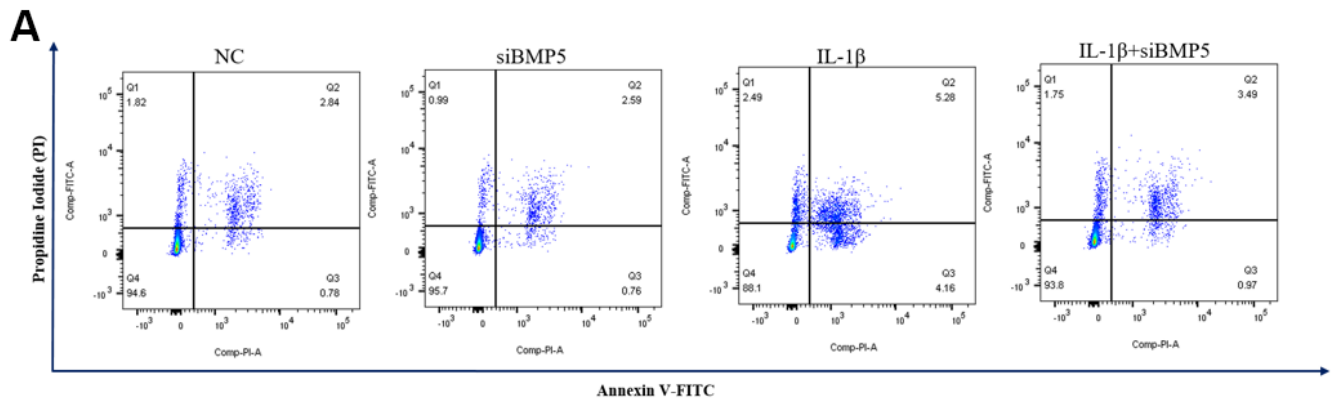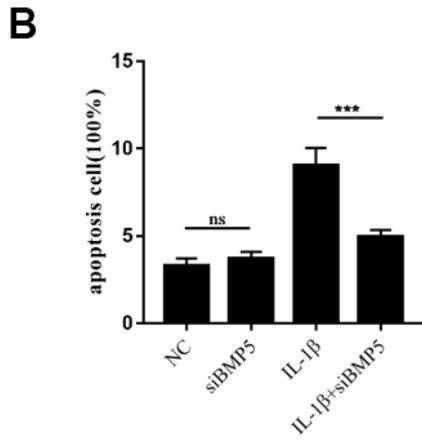

**Supplementary Figure 4. BMP5 silencing inhibits IL-1 $\beta$ -induced chondrocyte apoptosis.** (A, B) Flow cytometry assay results show the percentage of apoptotic cells in the siNC- and siBMP5-transfected murine chondrocytes treated with IL-1 $\beta$  and their corresponding controls. Note: ns, no significance; \*\*\*P<0.001.
